# Supplementary material
Source: PubMed Central journal article supplement (PMC2713516)
Supplement: supp_M109.001743_jbc.M109.001743-1.pdf [file supp_M109.001743_jbc.M109.001743-1.pdf]

## Supplementary Materials

### The sequence of primers and cDNA

The cDNA sequences of  $\alpha$ -1 mating factor and Aga2 signal sequences, and acid-base coils (En-Kn) are shown in Supplementary Fig. 1. The primers used to construct YS2H vector are listed in Supplementary Table. 1.

E5:  
1 GAAGTTT CTGCTTT GGAAAAG GAAGTTT CTGCTTT GGAAAAG GAAGTTT CTGCCTT AGAGAAA  
64 GAGGTCT CCGCTTT GGAAAAG GAAGTTT CTGCTTT GGAAAAG

E4:  
1 GAAGTTT CTGCTTT GGAAAAG GAAGTTT CTGCCTT AGAGAAA GAGGTCT CCGCTTT GGAAAAG  
64 GAAGTTT CTGCTTT GGAAAAG

E3 :  
1 GAAGTTT CTGCCTT AGAGAAA GAGGTCT CCGCTTT GGAAAAG GAAGTTT CTGCTTT GGAAAAG

K5:  
1 AAGGTTT CTGCTTT GAAGGAA AAGGTTA GTGCATT AAAAGAG AAAGTCT CCGCTTT GAAGGAA  
64 AAGGTTT CTGCTTT GAAGGAA AAGGTTT CTGCTTT GAAGGAA

K4:  
1 AAGGTTT CTGCTTT GAAGGAA AAGGTTA GTGCATT AAAAGAG AAAGTCT CCGCTTT GAAGGAA  
64 AAGGTTT CTGCTTT GAAGGAA

K3:  
1 AAGGTTT CTGCTTT GAAGGAA AAGGTTA GTGCATT AAAAGAG AAAGTCT CCGCTTT GAAGGAA

$\alpha$ -1 mating factor signal sequence  
1 ATGAGAT TTCCTTC AATTTTT ACTGCAG TTTTATT CGCAGCA TCCTCCG CATTAGC TGCTCCA  
64 GTCAACA CTACAAC AGAAGAT GAAACGG CACAAAT TCCGGCT GAAGCTG TCATCGG TTACTCA  
127 GATTTAG AAGGGGA TTTTCGAT GTTGCTG TTTTGCC ATTTTCC AACAGCA CAAATAA CGGGTTA  
190 TTGTTTA TAAATAC TACTATT GCCAGCA TTGCTGC TAAAGAA GAAGGGG TATCTCT CGAGAAA  
253 AGAGAGG CTGAAGC T

Aga2 signal sequence

1 ATGCAGT TACTTCG CTGTTTT TCAATAT TTTCTGT TATTGCT TCAGTTT TAGCA

**Supplementary Figure 1. cDNA sequences.**

**Supplementary Table 1.** DNA sequences of forward (f) and reverse (r) primers are shown.

| Product           | Primers                                                                                                                                                                                                      |
|-------------------|--------------------------------------------------------------------------------------------------------------------------------------------------------------------------------------------------------------|
| E5                | f:5'AGCTGCTAGCGAAGTTTCTGCTTTGGAAAAGGAAGTTTCTGCTTTGGAAAAGGAAGTTTC<br>TGCCTTAGAGAAAGAGGTCTCC-3'<br>r:5'CACCACTAGTCTTTTCCAAAGCAGAACTTCCTTTTCCAAAGCGGAGACCTCTTTCTCTA<br>AGGC -3'                                 |
| K5                | f:5'CACCATCGATTTTCCTTCAAAGCAGAAACCTTTTCCTCAAAGCAGAAACCTTTTCCTTCA<br>AAGCGGAGACTTTCTCTTTTAATGCACT -3'<br>r:5'CTCGACGCGTGGTGGTGGTGGTCTGGTGGTGGTGGTCTAAGGTTTCTGCTTTGAAGGA<br>AAAGGTTAGTGCAATTAAGAGAAAGTCTCC -3' |
| LFA-1 I<br>domain | f:5'- TTGTGTCGACAACGTAGACCTGGTATTTCT-3'<br>r:5'-CCATGGAGTCAGGTCCTGTTTGCTTG-3'                                                                                                                                |
| AL57              | f:5'-GGATGCTAGCGAAGTTCAATTGTTAGAGTC-3'<br>r:5'- GGTCGGATCCAGTTCGTTTGATTTCCACC-3'                                                                                                                             |
| TS1/22            | f: 5'- AGCAGCTAGCCAGGTTACCTGCAGCAATC -3'<br>r: 5'- CACCACTAGTAGCCCGTTTCAGCTCCAGC -3'                                                                                                                         |
| BoNT/A-LC         | f:5'-CGTTGTCGACCAATTCGTTAACAAGCAGTTCAAC-3'<br>r:5'- AGTCCCATGGTTTGCTCGTTATAATGCCTCTAAC-3'                                                                                                                    |
| BoNT/B-LC         | f:5'-CGTTGTCGACCCGGTGACGATCAACAACCTTC-3'<br>r:5'-AGTCCCATGGAACGCTCTTACACATTTGGATTT-3'                                                                                                                        |
| VHH-B8 &<br>G6    | f:5'-AGCTGCTAGCGCATGCCAGGCTCATGTCCAGCTGC-3;<br>r:5'-GTTCCGATCCACTAGTTGGTTGTGGTTTTGGTGTCTTGG-3'                                                                                                               |
| VHH library       | f:5'-AGCTGCTAGCCAGRCTSAGKTGCAGCTCGTGGAG-3'<br>r-I:5'-TGGTGGATCCTTGTGGTTTTGGTGTCTTGGG-3'<br>r-II:5'-TGGTGGATCCGGGGTCTTCGCTGTGGTGGC-3'                                                                         |
